# Supplementary material for: The Solute Carrier Family 2 Genes Are Potential Prognostic Biomarkers in Acute Myeloid Leukemia
Source: PubMed Central journal article supplement — Technol Cancer Res Treat. 2020 Jan 10;19:1533033819894308. doi: 10.1177/1533033819894308 (PMC7099669; doi:10.1177/1533033819894308), 2020-01-10
Supplement: S_Tables.pdf [file S_Tables.pdf]

Supplementary Table1. univariate analyses between patients' overall survival and the expression of SLC2 family genes

| Gene           | Cutoff  | Statistical value | P value | OR         | 2.5%CI | 97.5%CI | P value |
|----------------|---------|-------------------|---------|------------|--------|---------|---------|
| <i>SLC2A1</i>  | 706.29  | 2.12              | 0.15    | 1.62       | 0.82   | 3.23    | 0.17    |
| <i>SLC2A3</i>  | 2984.88 | 2.78              | 0.10    | 0.54       | 0.27   | 1.07    | 0.08    |
| <i>SLC2A4</i>  | 6.65    | 5.77              | 0.02    | 0.47       | 0.23   | 0.95    | 0.04    |
| <i>SLC2A5</i>  | 1104.45 | 9.33              | 0.00    | 3.43       | 1.63   | 7.69    | 0.00    |
| <i>SLC2A6</i>  | 192.44  | 3.28              | 0.07    | 1.50       | 0.76   | 3.02    | 0.25    |
| <i>SLC2A7</i>  | 6.98    | 2.13              | 0.14    | 2607311.48 | 0.00   | NA      | 0.99    |
| <i>SLC2A8</i>  | 36.56   | 5.75              | 0.02    | 1.80       | 0.91   | 3.60    | 0.09    |
| <i>SLC2A9</i>  | 193.78  | 0.09              | 0.77    | 0.60       | 0.30   | 1.19    | 0.14    |
| <i>SLC2A10</i> | 12.64   | 4.87              | 0.03    | 2.59       | 1.30   | 5.33    | 0.01    |
| <i>SLC2A11</i> | 139.12  | 2.31              | 0.13    | 1.53       | 0.78   | 3.08    | 0.22    |
| <i>SLC2A12</i> | 79.63   | 4.75              | 0.03    | 0.53       | 0.24   | 1.15    | 0.10    |
| <i>SLC2A13</i> | 141.70  | 6.73              | 0.01    | 0.34       | 0.14   | 0.75    | 0.01    |
| <i>SLC2A14</i> | 38.36   | 0.68              | 0.41    | 0.49       | 0.20   | 1.08    | 0.09    |

Supplementary Table2. Association between the clinicopathologic characteristics and patients' mortality in AML patients

| Variables              | Group        | Alive | Dead  | P value | Statistical method  |
|------------------------|--------------|-------|-------|---------|---------------------|
| Age                    |              | 49.18 | 61.82 | 0.00    | Student t test      |
| PBMBC                  |              | 58.84 | 58.6  | 0.95    | Student t test      |
| Gender                 | Female       | 26    | 54    | 0.09    | Fisher's exact test |
|                        | Male         | 77    | 94    |         |                     |
| Cytogenetic risk       | Favorable    | 69    | 40    | 0.00    | Fisher's exact test |
|                        | Intermediate | 48    | 94    |         |                     |
|                        | Poor         | 42    | 103   |         |                     |
| FLT3-IDT               | Negative     | 130   | 176   | 0.09    | Fisher's exact test |
|                        | Positive     | 29    | 61    |         |                     |
| CEBPA mutation         | Negative     | 61    | 82    | 0.83    | Fisher's exact test |
|                        | Positive     | 12    | 14    |         |                     |
| <i>IDH1</i> mutation   | Negative     | 61    | 88    | 0.19    | Fisher's exact test |
|                        | Positive     | 14    | 11    |         |                     |
| <i>DNMT3A</i> mutation | Negative     | 35    | 53    | 0.61    | Fisher's exact test |
|                        | Positive     | 25    | 31    |         |                     |
| <i>NPM1</i> mutation   | Negative     | 116   | 178   | 0.56    | Fisher's exact test |
|                        | Positive     | 43    | 57    |         |                     |
| Chemotherapy           | Yes          | 157   | 211   | 0.01    | Fisher's exact test |
|                        | No           | 1     | 14    |         |                     |
| Bone marrow transplant | Yes          | 70    | 42    | 0.00    | Fisher's exact test |
|                        | No           | 88    | 183   |         |                     |
| Targeted therapy       | Yes          | 15    | 55    | 0.00    | Fisher's exact test |
|                        | No           | 143   | 170   |         |                     |

Supplementary Table3. Linear regression analysis between clinicopathologic characteristics and SLC2 family gene expression in AML patients

| Gene           | Age | Gender<br>(male) | PBMBC | Cytogenetic<br>risk | FLT3-<br>IDT | <i>CEBPA</i><br>mutation | <i>IDH1</i><br>mutation | <i>DNMT3A</i><br>mutation | <i>NPM1</i><br>mutation | Chemot<br>herapy | Bone<br>marrow<br>transplant | Targeted<br>therapy |
|----------------|-----|------------------|-------|---------------------|--------------|--------------------------|-------------------------|---------------------------|-------------------------|------------------|------------------------------|---------------------|
| <i>SLC2A1</i>  |     |                  | ---   | -                   |              |                          |                         | -                         |                         |                  |                              |                     |
| <i>SLC2A3</i>  |     |                  | ---   |                     | ---          | --                       |                         |                           | -                       |                  |                              |                     |
| <i>SLC2A4</i>  | -   |                  | ---   |                     | --           |                          |                         |                           | ---                     |                  |                              | +                   |
| <i>SLC2A5</i>  |     |                  | -     | --                  |              |                          |                         |                           |                         | -                |                              | +                   |
| <i>SLC2A6</i>  |     |                  |       |                     |              | -                        |                         | +                         | -                       |                  |                              |                     |
|                |     |                  |       |                     |              |                          |                         | +                         |                         |                  |                              |                     |
| <i>SLC2A8</i>  |     |                  |       |                     |              | ---                      | +                       |                           |                         |                  |                              |                     |
| <i>SLC2A9</i>  |     |                  | +++   | +++                 |              | --                       |                         |                           | +++                     |                  |                              |                     |
| <i>SLC2A10</i> |     |                  |       |                     |              |                          |                         |                           | +++                     | -                |                              |                     |
| <i>SLC2A11</i> |     |                  | +++   |                     | +++          |                          |                         | -                         | +++                     |                  |                              |                     |
| <i>SLC2A12</i> |     |                  | ++    |                     | --           |                          |                         | -                         | ---                     |                  |                              |                     |
|                |     |                  |       |                     |              |                          |                         | -                         |                         |                  |                              |                     |
| <i>SLC2A13</i> |     | -                | +     | +++                 |              |                          |                         | +                         | +++                     |                  |                              |                     |
|                |     |                  |       |                     |              |                          |                         | +                         |                         |                  |                              |                     |
| <i>SLC2A14</i> |     | ---              | ---   |                     | ---          |                          |                         |                           |                         |                  |                              |                     |

+, ++, +++ denote positive correlation with P value < .05, P value < .01 and P value < .001 respectively.

-, --, --- stand for negative correlation with P value < .05; P value < .01 and P value < .001 respectively.

Supplementary Table4. multivariate analyses between patients' overall survival and the mortality-associated features, *SLC2A5*, *SLC2A10* and *SLC2A13* expression levels in the validation set

| Clinical features      | OR (95%CI)      | P-value |
|------------------------|-----------------|---------|
| Age                    | 1.03(1.02-1.05) | 0.00    |
| Cytogenetic risk       | 2.04(1.49-2.81) | 0.      |
| Chemotherapy           | 0.32(0.02-1.81) | 0.29    |
| Bone marrow transplant | 0.3(0.18-0.52)  | 0.00    |
| Targeted therapy       | 2.5(1.28-5.13)  | 0.00    |
| <i>SLC2A5</i>          | 1.61(0.95-2.77) | 0.08    |
| <i>SLC2A10</i>         | 1.97(1.07-3.73) | 0.03    |
| <i>SLC2A13</i>         | 0.7(0.42-1.15)  | 0.16    |
